# Supplementary material for: First Case Report of Primary Carnitine Deficiency Manifested as Intellectual Disability and Autism Spectrum Disorder
Source: PubMed Central journal article supplement (PMC6628273; doi:10.3390/brainsci9060137), 2019-06-13
Supplement: brainsci-09-00137-s001.pdf [file brainsci-09-00137-s001.pdf]

# Supplementary Material: First Case Report of Primary Carnitine Deficiency Manifested as Intellectual Disability and Autism Spectrum Disorder

José Guevara-Campos <sup>1</sup>, Lucía González-Guevara <sup>2</sup>, José Guevara-González <sup>3</sup>, and Omar Cauli <sup>4,\*</sup>

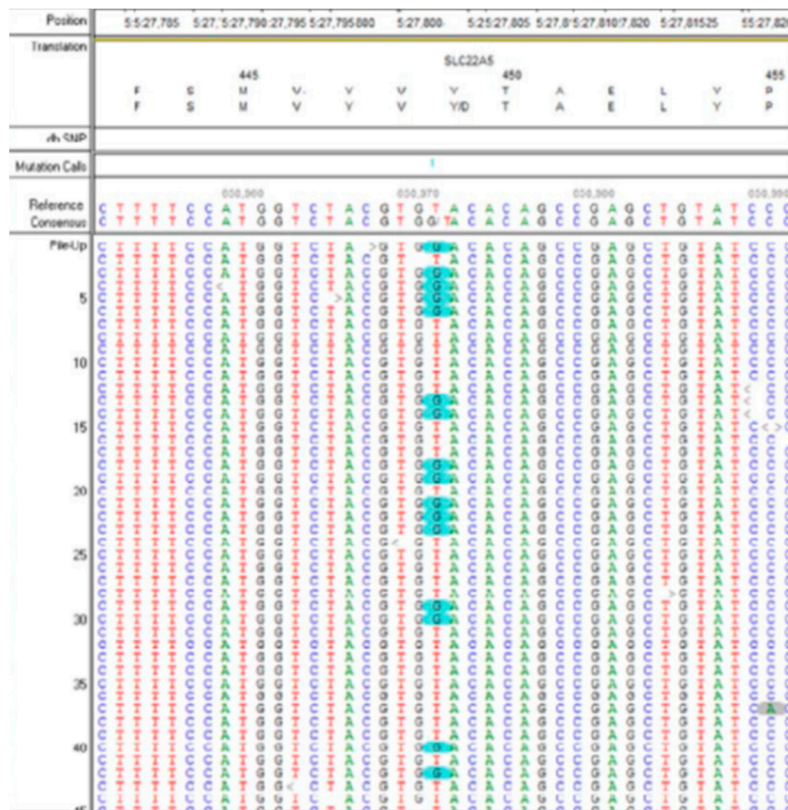

Figure S1. Identification of c.1345T>G (p.Y449D, p.Tyr449Asp) mutation in the SLC22A5 gene.
